# Supplementary material
Source: PubMed Central journal article supplement (PMC4919510)
Supplement: mmc1.pdf [file mmc1.pdf]

**Biophysical Journal, Volume 110**

**Supplemental Information**

**Binding Mechanism of the N-Terminal SH3 Domain of CrkII and Proline-Rich Motifs in cAbl**

**Veer S. Bhatt, Danyun Zeng, Inna Krieger, James C. Sacchettini, and Jae-Hyun Cho**

**Table S1.** Proline-rich motifs (PRMs) in human cAbl-1A tested for the binding to the nSH3 domain of CrkII

| Sequence <sup>a</sup>                        | K <sub>d</sub> (μM) |
|----------------------------------------------|---------------------|
| PRM <sup>524</sup><br>QA <b>P</b> ELPTKTRTSY | 1.72 ± 0.47         |
| PRM <sup>546</sup><br>DV <b>P</b> EMPHSKGQY  | N. D.               |
| PRM <sup>568</sup><br>V <b>S</b> PLLPRKERGY  | 2.90 ± 0.19         |
| PRM <sup>610</sup><br>TA <b>P</b> TPPKRSSSY  | N. D.               |
| PRM <sup>758</sup><br>YE <b>K</b> PALPRKR    | 1.72 ± 0.48         |
| PRM <sup>781</sup><br>YR <b>P</b> PPRLVKK    | N. D.               |
| PRM <sup>897</sup><br>PA <b>P</b> PPPPAASAY  | N. D.               |
| PRM <sup>956</sup><br>KK <b>P</b> VLPATPKPQY | N. D.               |

<sup>a</sup> The number in the peptide name corresponds to the amino acid number of first proline in each sequence (shown in bold). Tyrosine is added to either the N- or the C-terminal end of each peptide to measure the concentration of the peptide.

**Table S2. Data Collection and Refinement Statistics**

|                                                                 |                       |
|-----------------------------------------------------------------|-----------------------|
|                                                                 | Data Collection       |
| source                                                          | Cu K $\alpha$         |
| space group                                                     | P12 <sub>1</sub> 1    |
| unit cell parameters                                            |                       |
| a, b, c (Å)                                                     | 45.2, 29.5, 45.8      |
| $\alpha$ , $\beta$ , $\gamma$ (deg)                             | 90.0, 94.3, 90.0      |
| temperature (K)                                                 | 113.15                |
| wavelength (Å)                                                  | 1.5                   |
| resolution (Å)                                                  | 50.00-1.80 (1.83-     |
| R <sub>merge</sub> <sup>b</sup>                                 | 0.14 (0.17)           |
| completeness (%)                                                | 99.1 (98.9)           |
| $\langle I/\sigma(I) \rangle$                                   | 38.1 (27.6)           |
| total number of reflections                                     | 39207                 |
| Average redundancy                                              | 3.5 (3.3)             |
|                                                                 | Refinement Statistics |
| resolution (Å)                                                  | 45.6-1.8              |
| number of reflections                                           | 10714                 |
| R <sub>factor</sub> <sup>c</sup>                                | 0.17                  |
| R <sub>free</sub> <sup>c</sup>                                  | 0.24                  |
| number of protein atoms per chain                               | 501                   |
| number of water atoms                                           | 181                   |
| number of ligand atoms per chain                                | 94                    |
| rms deviation from ideal values <sup>d</sup> for bond distances | 0.022                 |
| rms deviation from ideal values for bond angles                 | 2.04                  |
| average                                                         | B-factors             |
| chain A of the protein (Å <sup>2</sup> )                        | 17.80                 |
| chain B of the protein (Å <sup>2</sup> )                        | 19.60                 |
| chain M of the ligand (Å <sup>2</sup> )                         | 30.00                 |
| chain N of the ligand (Å <sup>2</sup> )                         | 24.60                 |
| water molecules (Å <sup>2</sup> )                               | 31.11                 |
| Ramachandran plot <sup>e</sup>                                  |                       |
| favored (%)                                                     | 98.32                 |
| disallowed (%)                                                  | 0                     |

<sup>a</sup>The numbers in parentheses refer to the highest resolution shell.

$$^b R_{\text{merge}} = \frac{\sum_{hkl} \sum_j |I_{hkl,j} - \langle I_{hkl} \rangle|}{\sum_{hkl} \sum_j \langle I_{hkl} \rangle}$$

<sup>c</sup>R<sub>factor</sub> =  $\sum |F_{\text{obs}} - F_{\text{calc}}| / \sum |F_{\text{obs}}|$ , where R<sub>free</sub> refers to the R<sub>factor</sub> for 5% of the data that

<sup>d</sup>Ideal values used from Engh and Huber (1)

<sup>e</sup>Validation by COOT (2)

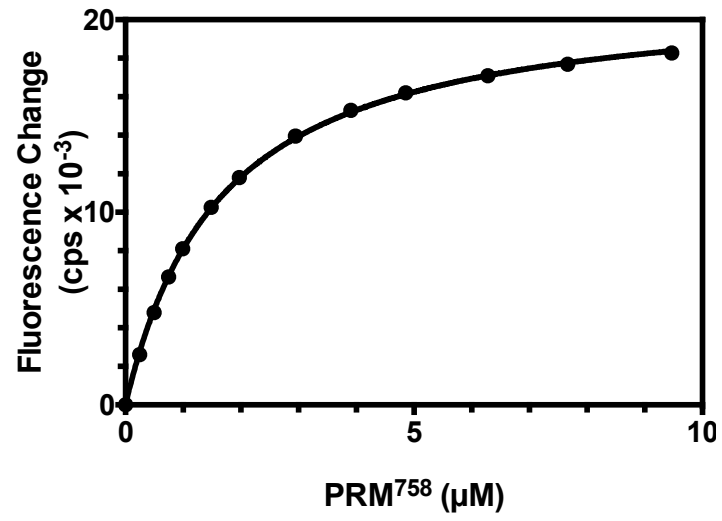

**Figure S1.** Binding isotherm of PRM<sup>758</sup> to the nSH3 domain at pH 7.5 in Hepes buffer. The measured K<sub>d</sub> is 1.6 μM.

### **Supporting References**

1. Engh, R. A., and R. Huber. 1991. Accurate bond and angle parameters for X-ray protein structure refinement. *Acta Crystallogr A* 47:392-400.
2. Emsley, P., and K. Cowtan. 2004. Coot: model-building tools for molecular graphics. *Acta Crystallogr D Biol Crystallogr* 60:2126-2132.
